# Supplementary material
Source: MDPI journal article supplement (https://www.mdpi.com/2311-5637/10/3/116)

# Original Images for Blots/Gels

Supplementary Figure S1. Original photographs for the blots of each protein marker of Figure 4(A).

**Figure 4**

(A)

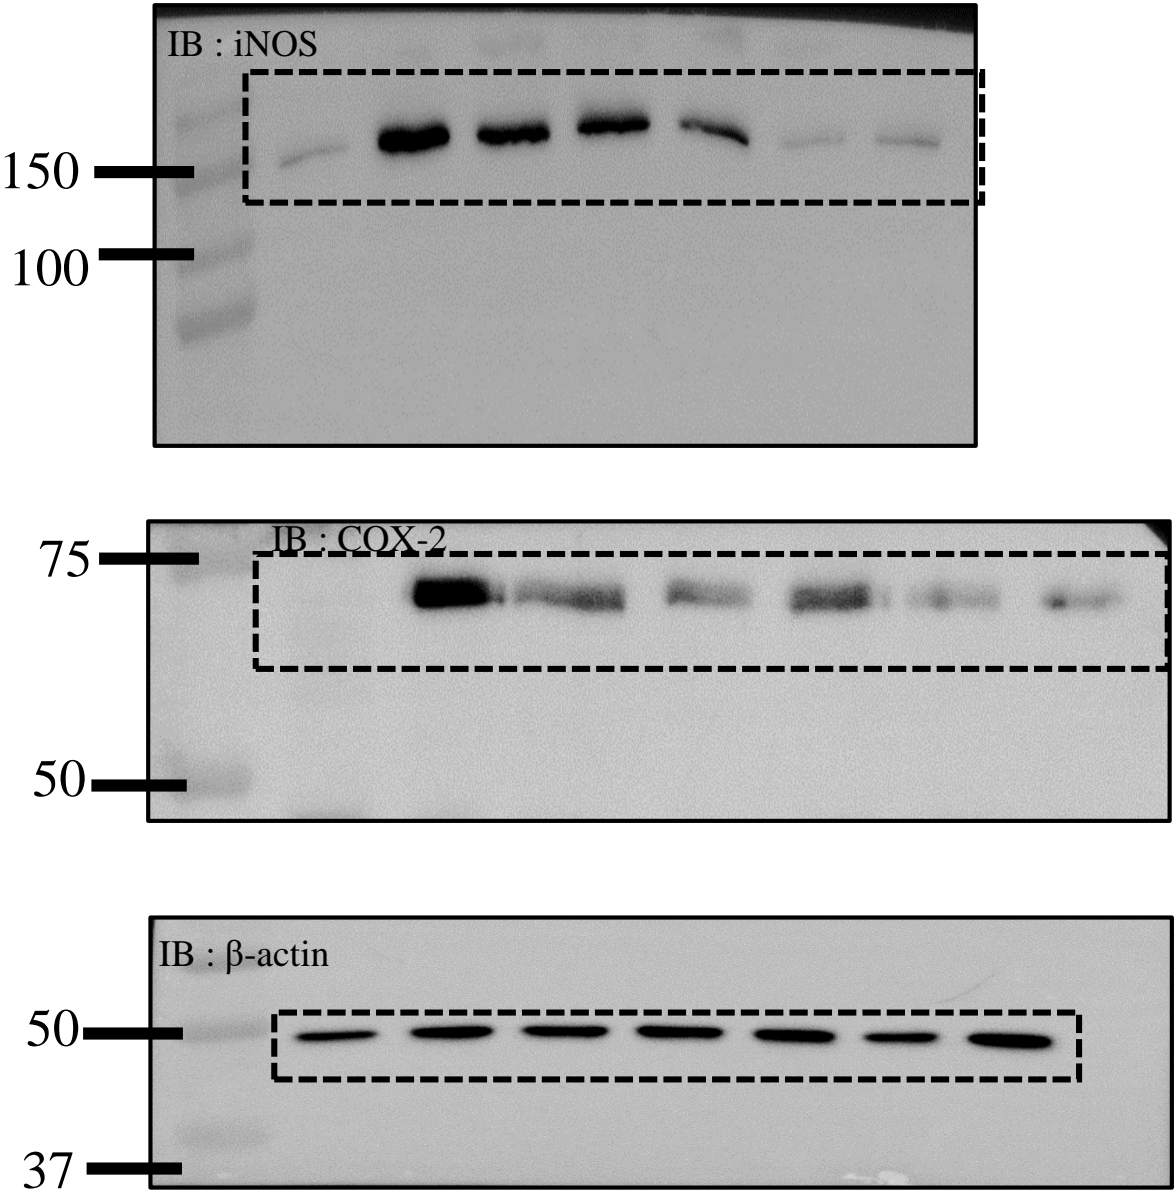

# Original Images for Blots/Gels

Supplementary Figure S2. Original photographs for the gels of each DNA marker of Figure 5(A).

**Figure 5**

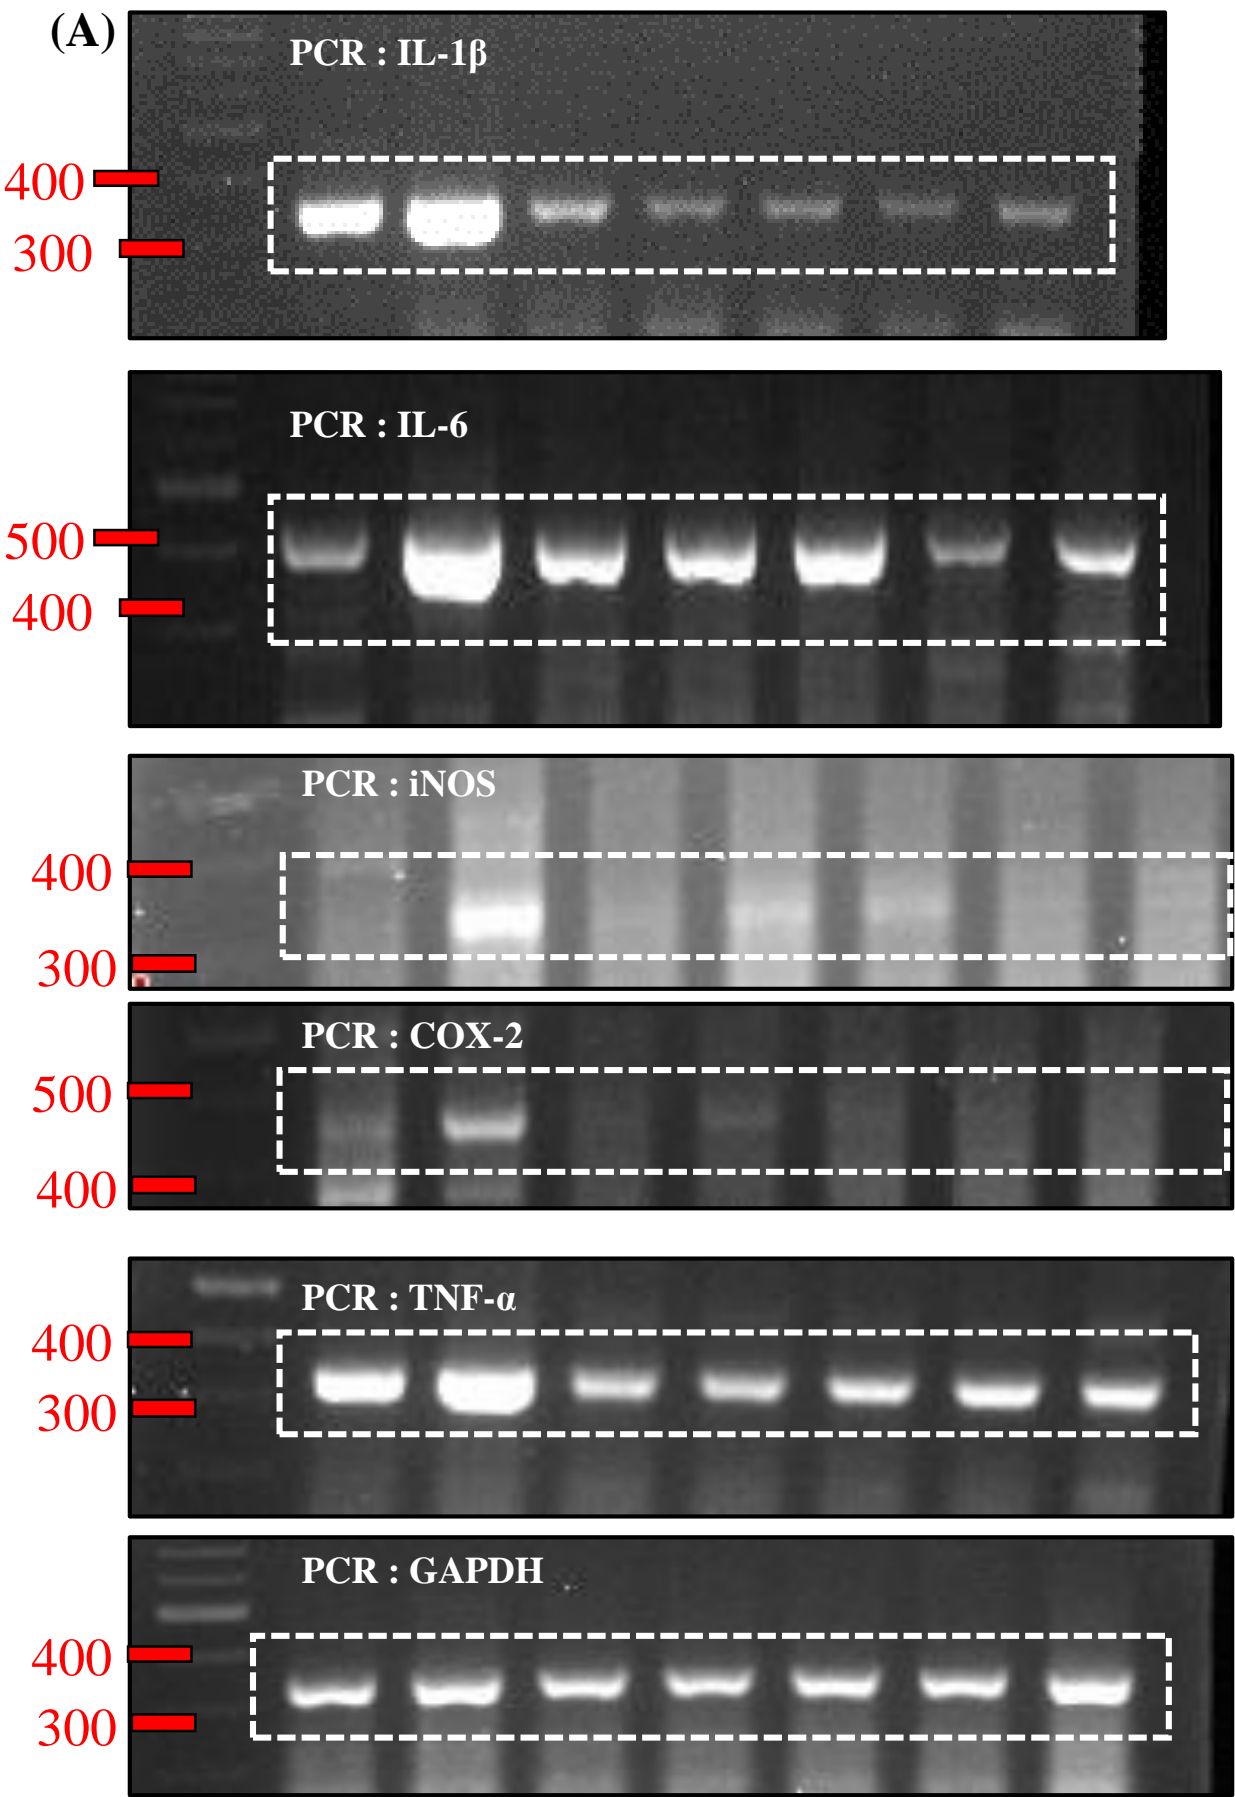

# Original Images for Blots/Gels

Supplementary Figure S3. Original photographs for the blots of each protein marker of Figure 6(A).

**Figure 6**

(A)

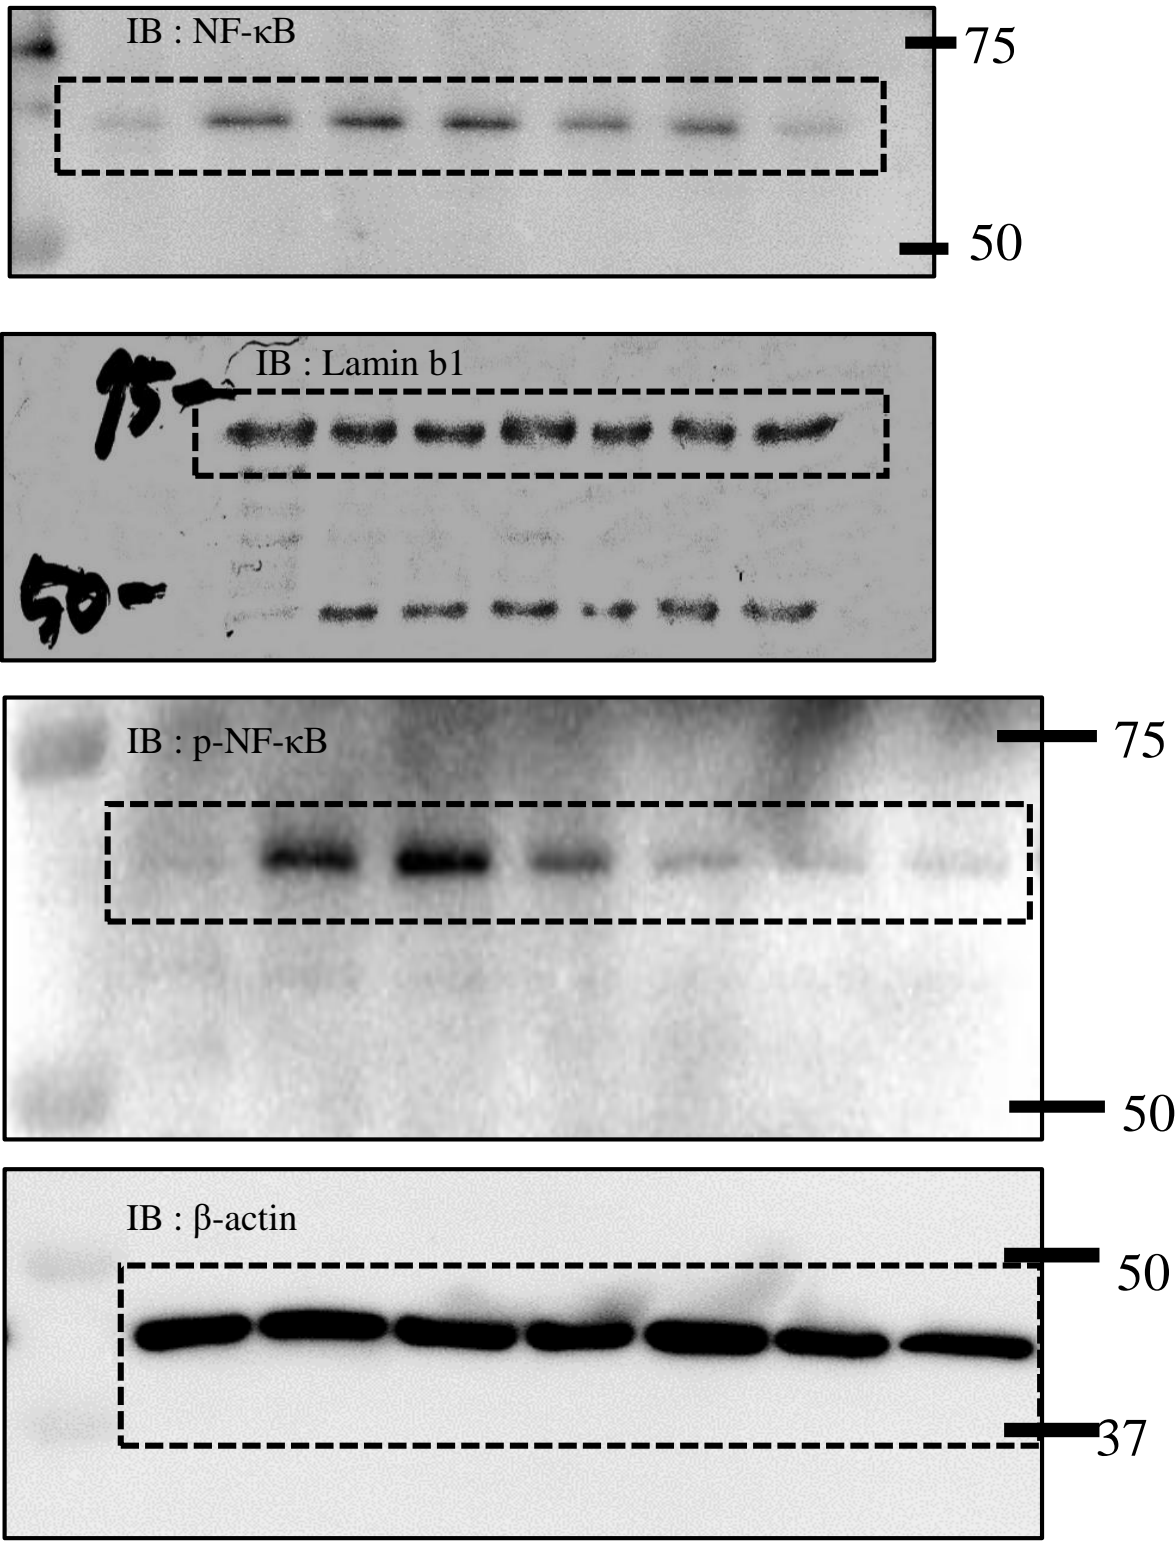

# Original Images for Blots/Gels

Supplementary Figure S4. Original photographs for the blots of each protein marker of Figure 7(A).

**Figure 7**

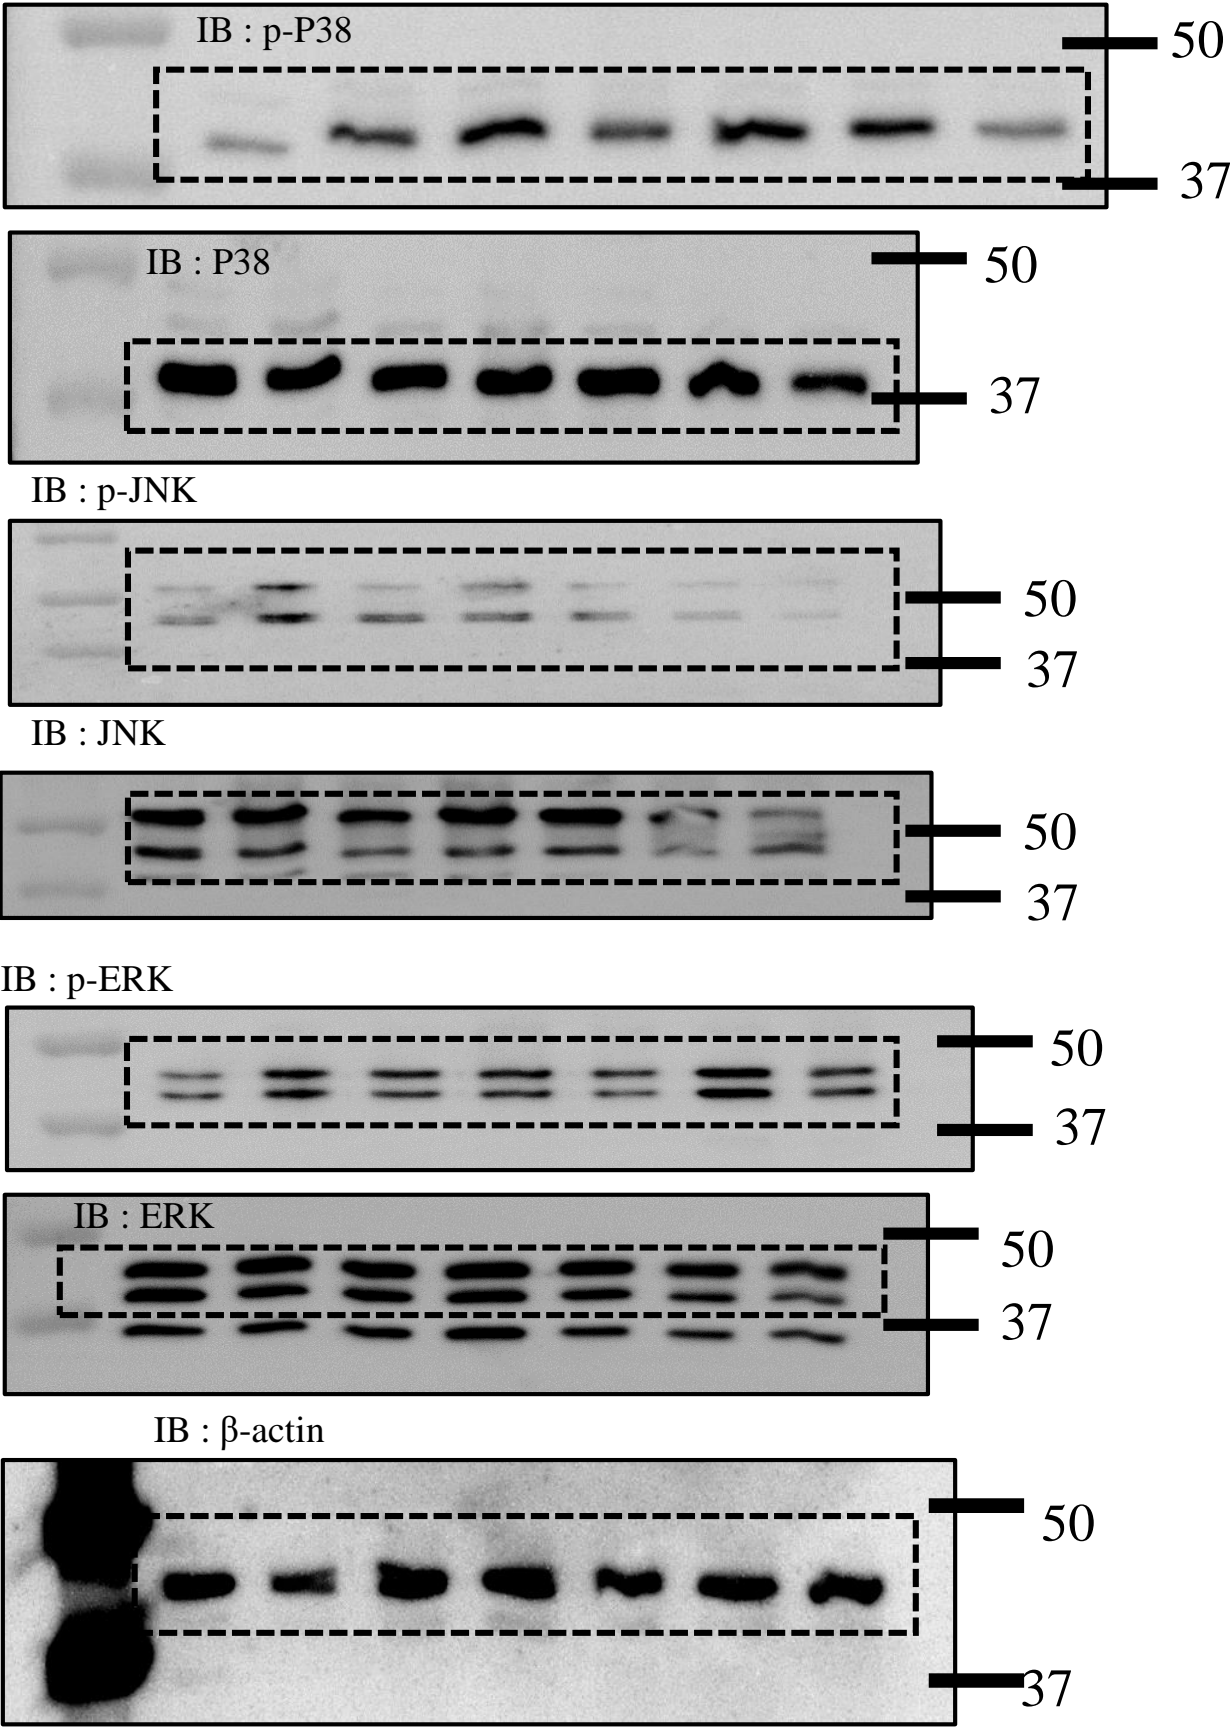

# Original Images for Blots/Gels

Supplementary Figure S5. Original photographs for the blots of each protein marker of Figure 9(A).

**Figure 9**

(A)

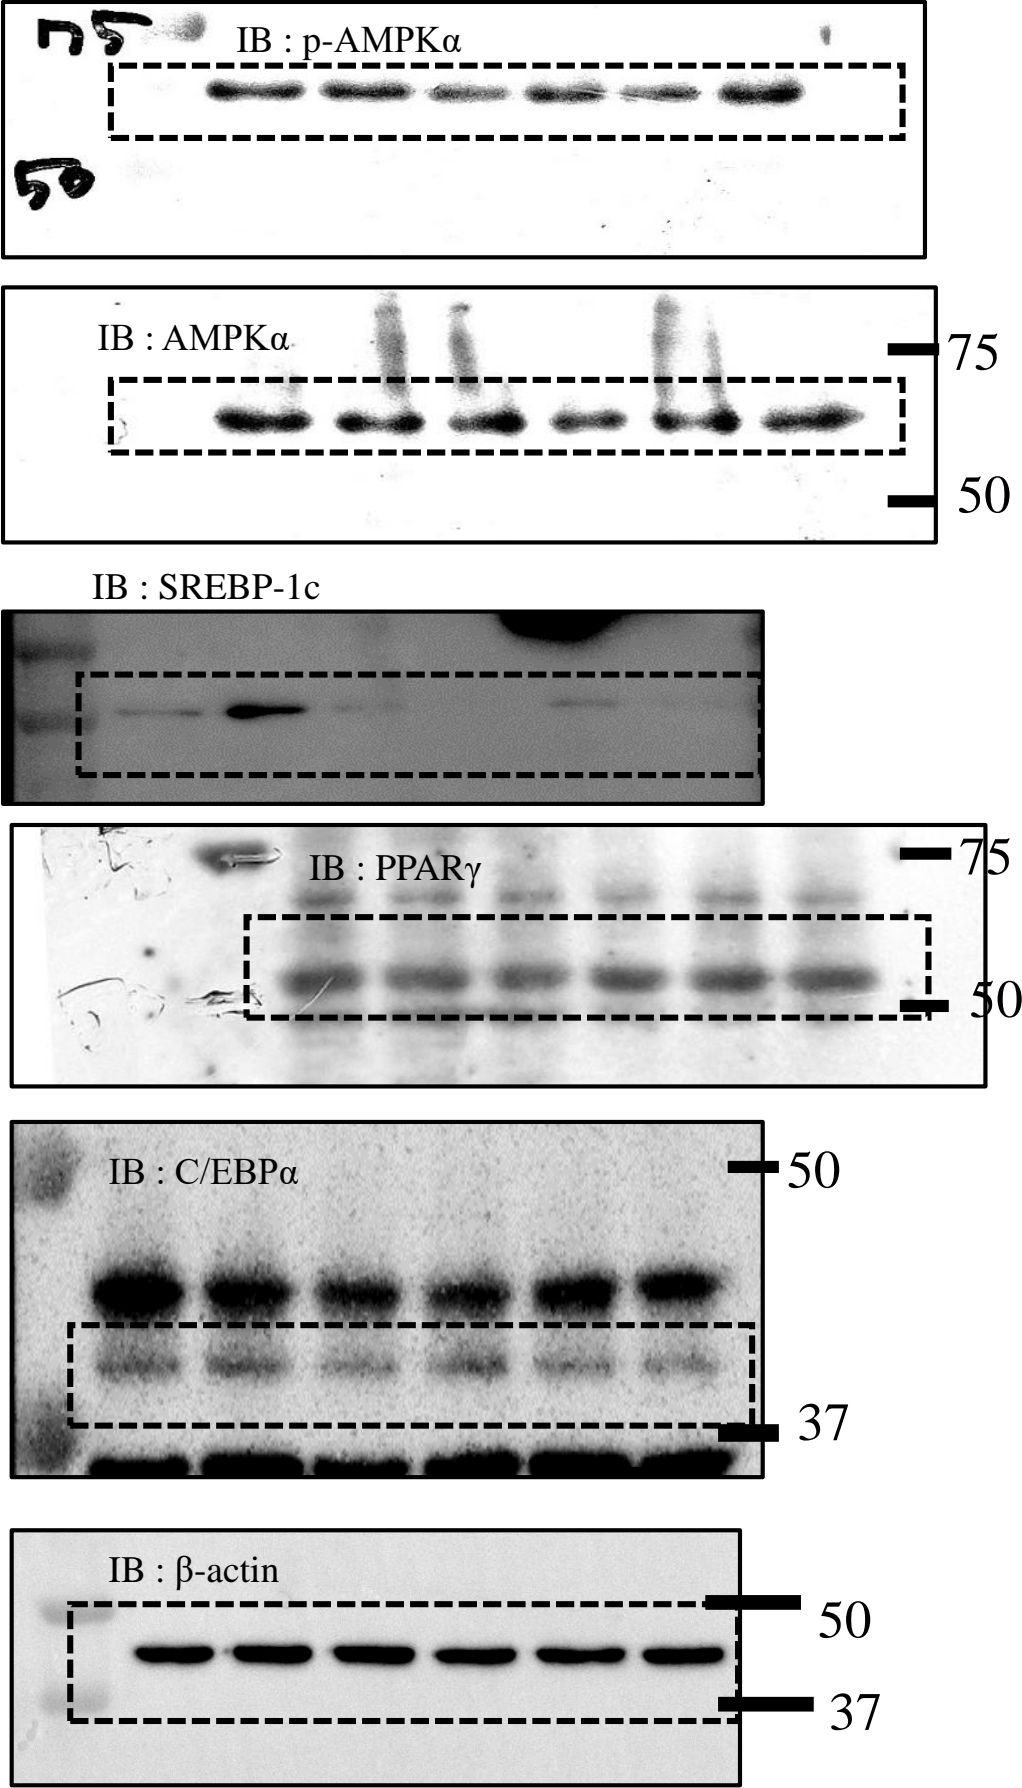

# Original Images for Blots/Gels

Supplementary Figure S6. Original photographs for the gels of each DNA marker of Figure 10(A).

**Figure 10**

(A)

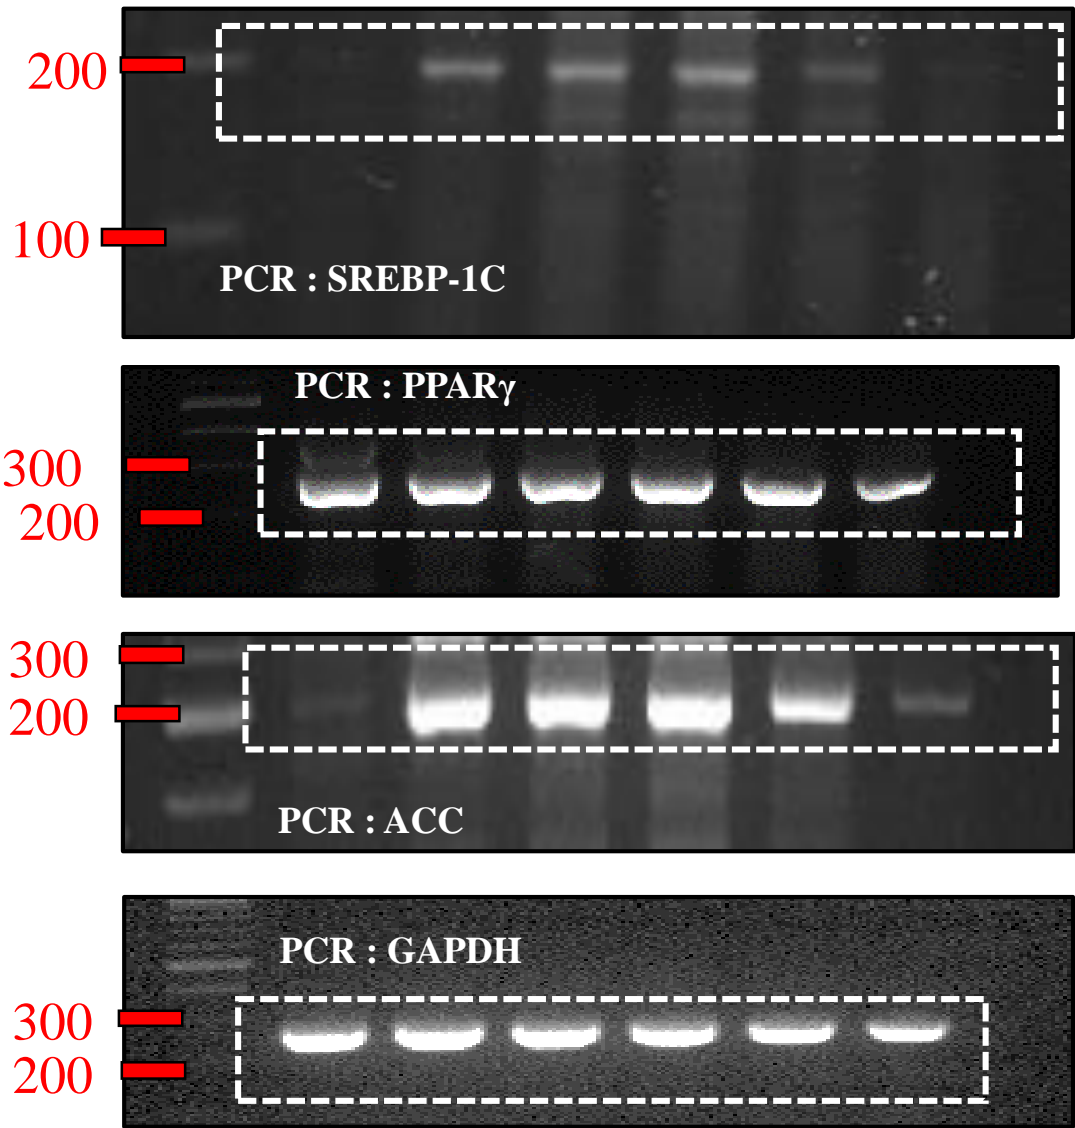

Supplement: s1 [file s1]
